# Supplementary material
Source: publisher figshare collection journal article supplement (https://sage.figshare.com/ndownloader/files/22862612)
Supplement: Supplementary file 1 [file 22862612]

**Online Only Material**

Appendix B: Data Sources from Each Program

|  | **Course Sessions and Activities Observed** | **People Interviewed** | **Documents Collected** |
| --- | --- | --- | --- |
| **NETR** | - Orientation - 8 sessions of the “Relationships & Student Investment” course - 2 sessions of the “Classroom Management” course - 2 sessions of “English Instructional Methods” course - End-of-year BBQ - 2 sessions of Tutorial (across 2 residents) - 4 sessions of student teaching (across 2 residents) | Program Employees   - Founding Director - Director of Coaching - Director of Curriculum - Director of Instructional Methods - 2 NETR Coaches   10 Residents (by concentration):   - 4 English/ Social Studies[[1]](#footnote-1) - 1 Math - 1 Science - 4 Elementary   Race of residents interviewed   - 7 white; 3 people of color | - NETR Core Values - Public-facing documents (like website and promotional materials) - Course Guides and syllabi for “Relationships & Student Investment,” Instructional Methods, Classroom Management - Professionalism Handbook - Evaluation Rubric - Handouts and PowerPoints for observed sessions |
| **PTR** | - 2 Sessions of Child Development course - 4 Sessions of “Middle School Cultures” course - 2 Sessions of Social Studies Methods Course - 4 sessions of “Issues of Equity” - 3 Xanadu school-wide events - Graduation - 11 student teaching sessions (across 4 residents) | Program Employees:   - Program Director - Program Assistant Director - Faculty Instructor - 2 Guiding Teachers   9 Residents (by concentration):   - 4 Humanities - 1 Science - 4 Elementary   Race of residents interviewed   - 8 white; 1 person of color | - Resident Experience Guide - Orientation information - Summer Assignments - Syllabi for various courses including “Issues of Equity” and “The School Aged Child” - Various required reading, class assignments, and class handouts - Dissertation on the school |

1. Both programs dual certified in English/Social Studies, PTR called this “humanities.” [↑](#footnote-ref-1)
